# Supplementary material for: Development Trajectories of Fatigue, Quality of Life, and the Ability to Work among Colorectal Cancer Patients in the First Year after Rehabilitation—First Results of the MIRANDA Study
Source: MDPI journal article supplement (doi:10.3390/cancers15123168), 2023-06-13
Supplement: s1 [file s1]

## Supplemental Material

### Development trajectories of fatigue, quality of life, and the ability to work among colorectal cancer patients in the first year after rehabilitation – First results of the MIRANDA study

#### Table of contents

|                                                                                                                                                                                                                      |   |
|----------------------------------------------------------------------------------------------------------------------------------------------------------------------------------------------------------------------|---|
| <b>Suppl. Table S1.</b> Cross-tabulation of the categories of the FACIT-F-FWB-ability to work (AW) item and the Work Ability Index (WAI) .....                                                                       | 2 |
| <b>Suppl. Table S2.</b> Comparison of important baseline characteristics of participants of all follow-ups and individuals who dropped out of the study by non-response to at least one follow-up questionnaire..... | 3 |
| <b>Suppl. Figure S1.</b> Trajectories of FACIT-F-FS (A), EORTC-QLQ-C30-GHS/QoL (B), and FACIT-F-FWB-AW (C) from baseline to 12-month follow-up by sex.....                                                           | 4 |
| <b>Suppl. Figure S2.</b> Trajectories of FACIT-F-FS (A), EORTC-QLQ-C30-GHS/QoL (B), and FACIT-F-FWB-AW (C) from baseline to 12-month follow-up by age .....                                                          | 5 |
| <b>Suppl. Figure S3.</b> Trajectories of FACIT-F-FS (A), EORTC-QLQ-C30-GHS/QoL (B), and FACIT-F-FWB-AW (C) from baseline to 12-month follow-up by stage .....                                                        | 6 |
| <b>Suppl. Figure S4.</b> Trajectories of FACIT-F-FS (A), EORTC-QLQ-C30-GHS/QoL (B), and FACIT-F-FWB-AW (C) from baseline to 12-month follow-up by participation in the VICTORIA study .....                          | 7 |
| <b>Suppl. Figure S5.</b> Trajectories of FACIT-F-FS (A), EORTC-QLQ-C30-GHS/QoL (B), and FACIT-F-FWB-AW (C) from baseline to 12-month follow-up by time since surgery .....                                           | 8 |

**Suppl. Table S1.** Cross-tabulation of the categories of the FACIT-F-FWB-ability to work (AW) item and the Work Ability Index (WAI)

| FACIT-F-FWB-AW | WAI index |            |            | Total n (%)            |
|----------------|-----------|------------|------------|------------------------|
|                | 1         | 2          | 3-4        |                        |
| 1-3            | 3 (6.1%)  | 7 (14.3%)  | 2 (4.1%)   | 12 (24.5%)             |
| 4              | 1 (2%)    | 13 (26.5%) | 3 (6.1%)   | 17 (34.7%)             |
| 5              | 0 (0%)    | 11 (22.5%) | 9 (18.3%)  | 20 (40.8%)             |
| Total n (%)    | 4 (8.2%)  | 31 (63.3%) | 14 (28.6%) | 49 (100%) <sup>a</sup> |

Abbreviations: FACIT-F-FWB-AW, Functional Assessment of Chronic Illness Therapy – Fatigue – Functional Well-Being – Ability to Work item; WAI, Work Ability Index

<sup>a</sup> Only study participants who worked at the 9-month follow-up could be included in this analysis (N=49) because the WAI can only be answered by individuals who are currently at work.

**Suppl. Table S2.** Comparison of important baseline characteristics of participants of all follow-ups and individuals who dropped out of the study by non-response to at least one follow-up questionnaire

|                                            | Response to all<br>follow-up<br>questionnaires<br>(N=114) | Non-response to<br>at least one follow-up<br>questionnaire<br>(N=33) | P value <sup>a</sup> |
|--------------------------------------------|-----------------------------------------------------------|----------------------------------------------------------------------|----------------------|
|                                            | Proportion (%)                                            | Proportion (%)                                                       |                      |
| <b>Age (years)</b>                         |                                                           |                                                                      |                      |
| < 65                                       | 71 (62.3)                                                 | 19 (57.6)                                                            | 0.625                |
| ≥ 65                                       | 43 (37.7)                                                 | 14 (42.4)                                                            |                      |
| <b>Sex</b>                                 |                                                           |                                                                      |                      |
| Female                                     | 41 (35.9)                                                 | 14 (47.4)                                                            | 0.500                |
| Male                                       | 73 (64.0)                                                 | 19 (57.6)                                                            |                      |
| <b>Cancer stage</b>                        |                                                           |                                                                      |                      |
| I                                          | 37 (32.5)                                                 | 12 (36.4)                                                            | 0.737                |
| II                                         | 37 (32.5)                                                 | 8 (24.2)                                                             |                      |
| III                                        | 27 (23.7)                                                 | 10 (30.3)                                                            |                      |
| Unknown                                    | 13 (11.4)                                                 | 2 (6.1)                                                              |                      |
| <b>Participation in<br/>VICTORIA study</b> |                                                           |                                                                      |                      |
| Yes                                        | 55 (48.3)                                                 | 18 (45.5)                                                            | 0.524                |
| No                                         | 59 (51.7)                                                 | 15 (54.5)                                                            |                      |

<sup>a</sup> Chi square test

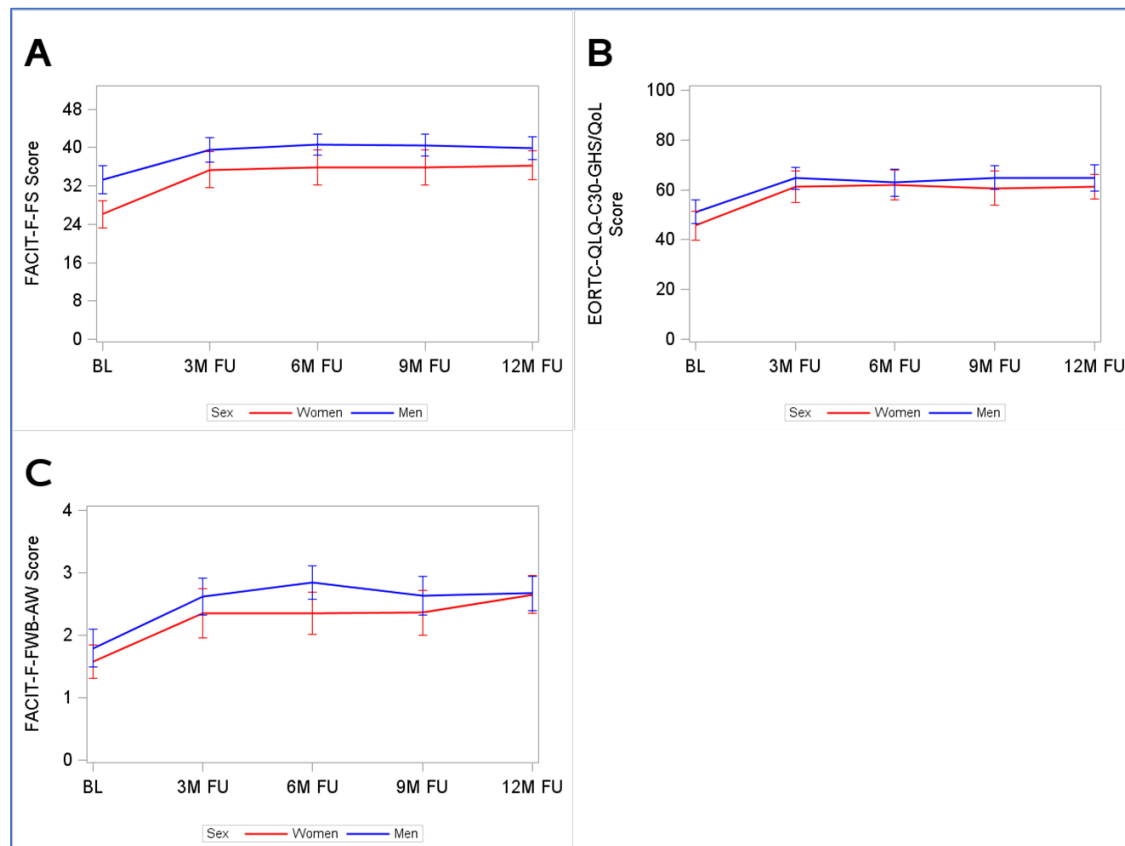

**Suppl. Figure S1.** Trajectories of FACIT-F-FS (A), EORTC-QLQ-C30-GHS/QoL (B), and FACIT-F-FWB-AW (C) from baseline to 12-month follow-up by sex

Abbreviations: BL, baseline; 3M FU, 3-month follow-up; 6M FU, 6-month follow-up; 9M FU, 9-month follow-up; 12M FU, 12-month follow-up

Note: The figure displays means with 95% confidence intervals.

Only study participants with complete follow-up data were included in this analysis (n=114).

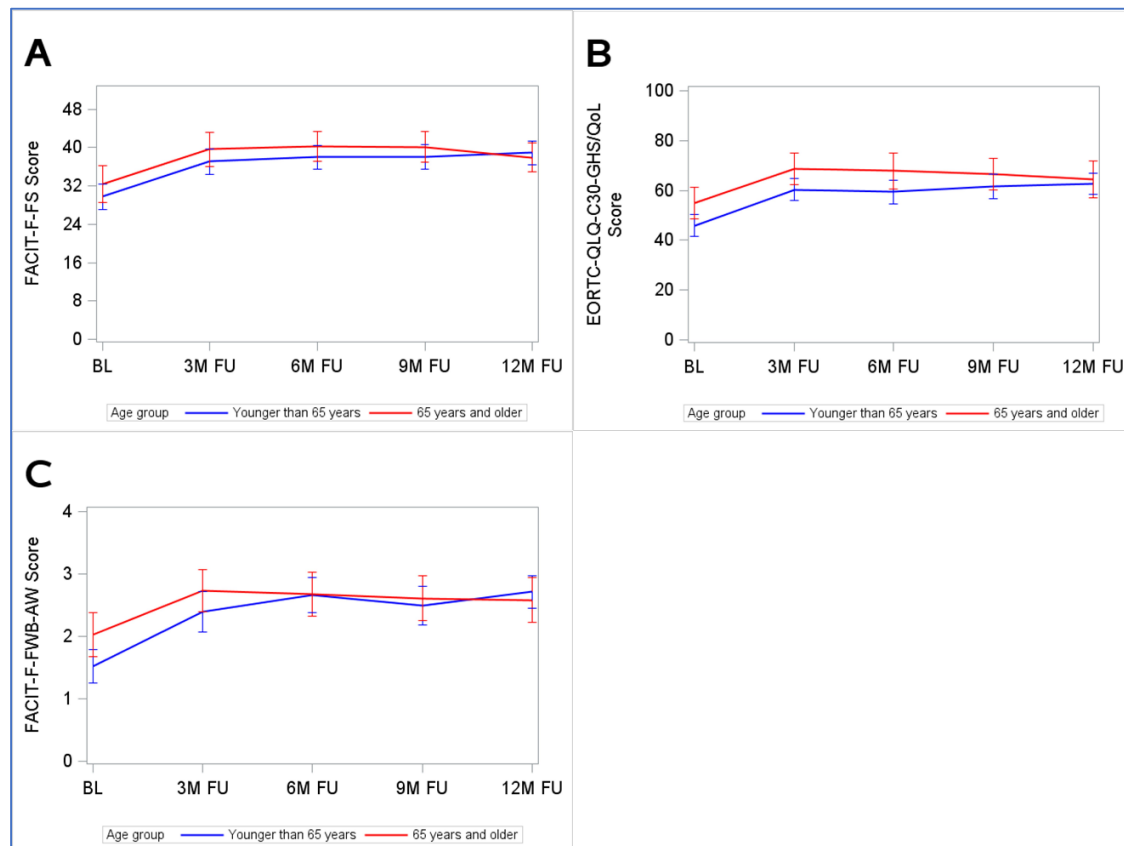

**Suppl. Figure S2.** Trajectories of FACIT-F-FS (A), EORTC-QLQ-C30-GHS/QoL (B), and FACIT-F-FWB-AW (C) from baseline to 12-month follow-up by age

Abbreviations: BL, baseline; 3M FU, 3-month follow-up; 6M FU, 6-month follow-up; 9M FU, 9-month follow-up; 12M FU, 12-month follow-up

Note: The figure displays means with 95% confidence intervals.

Only study participants with complete follow-up data were included in this analysis (n=114).

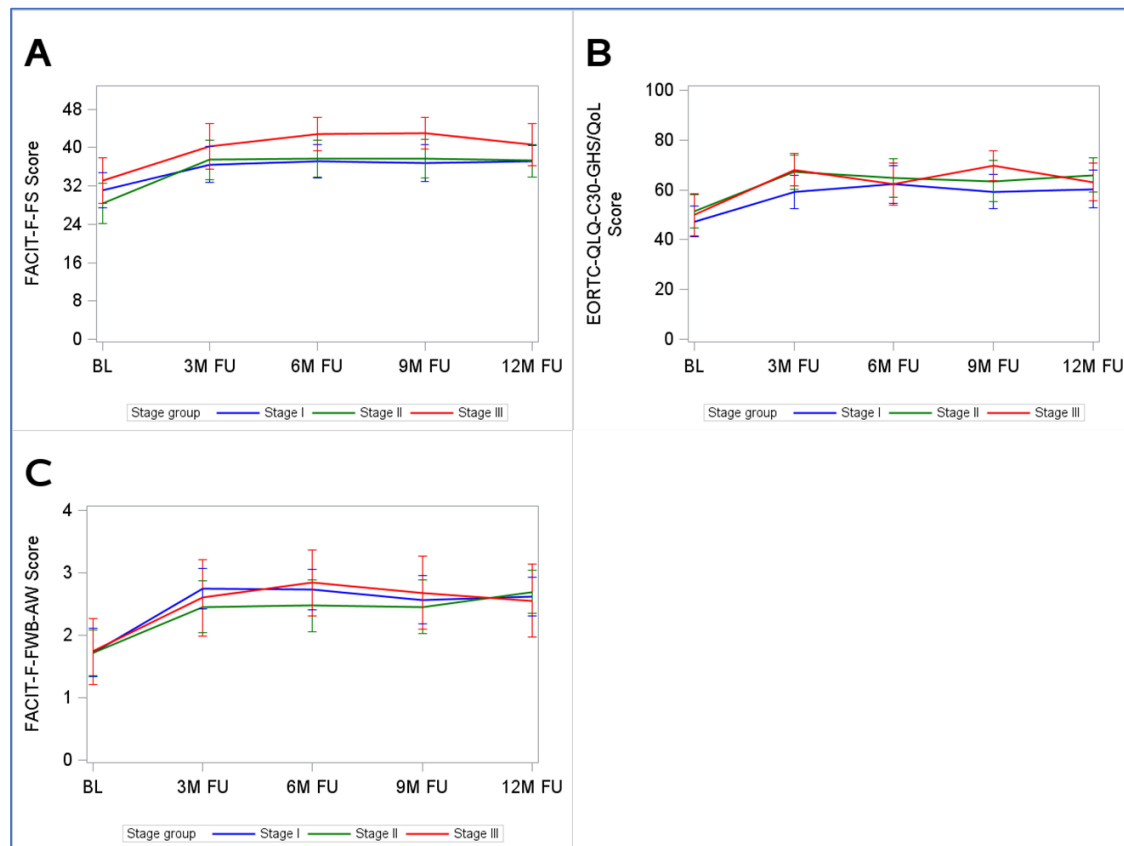

**Suppl. Figure S3.** Trajectories of FACIT-F-FS (A), EORTC-QLQ-C30-GHS/QoL (B), and FACIT-F-FWB-AW (C) from baseline to 12-month follow-up by stage

Abbreviations: BL, baseline; 3M FU, 3-month follow-up; 6M FU, 6-month follow-up; 9M FU, 9-month follow-up; 12M FU, 12-month follow-up

Note: The figure displays means with 95% confidence intervals.

Only study participants with complete follow-up data were included in this analysis (n=114).

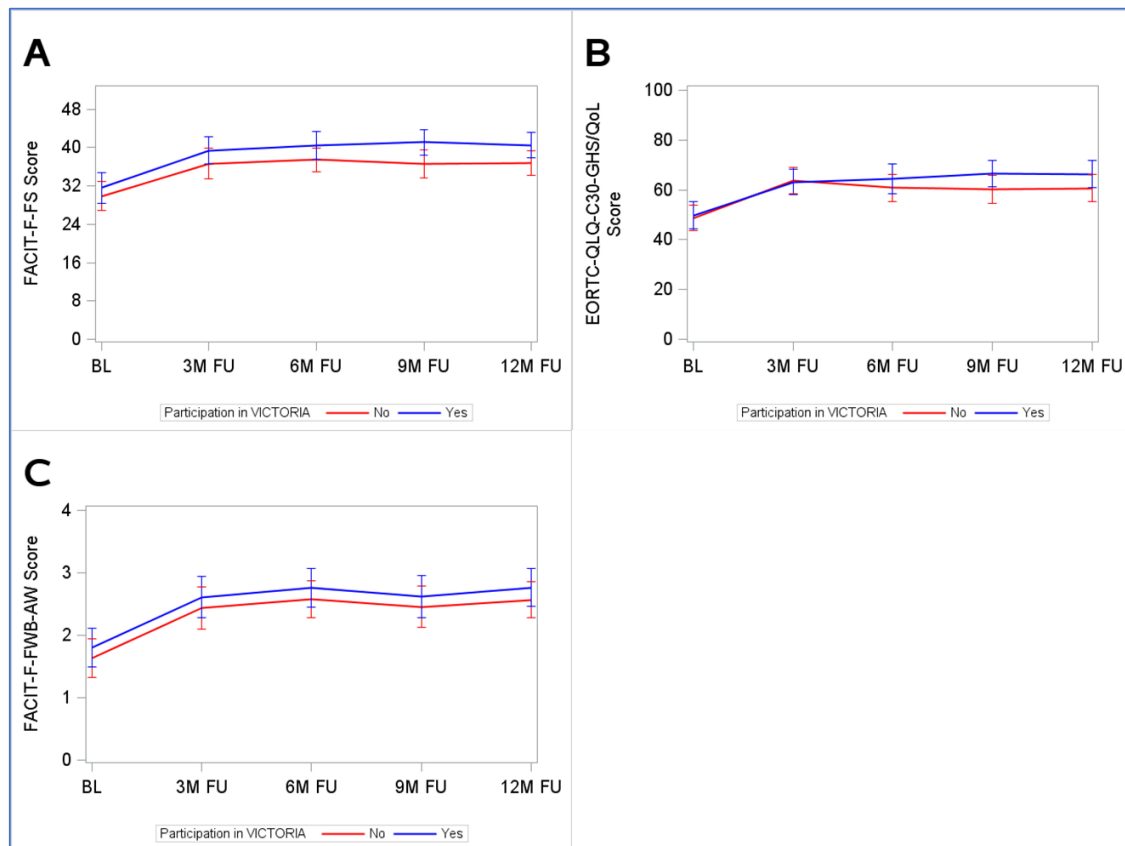

**Suppl. Figure S4.** Trajectories of FACIT-F-FS (A), EORTC-QLQ-C30-GHS/QoL (B), and FACIT-F-FWB-AW (C) from baseline to 12-month follow-up by participation in the VICTORIA study

Abbreviations: BL, baseline; 3M FU, 3-month follow-up; 6M FU, 6-month follow-up; 9M FU, 9-month follow-up; 12M FU, 12-month follow-up

Note: The figure displays means with 95% confidence intervals.

Only study participants with complete follow-up data were included in this analysis (n=114).

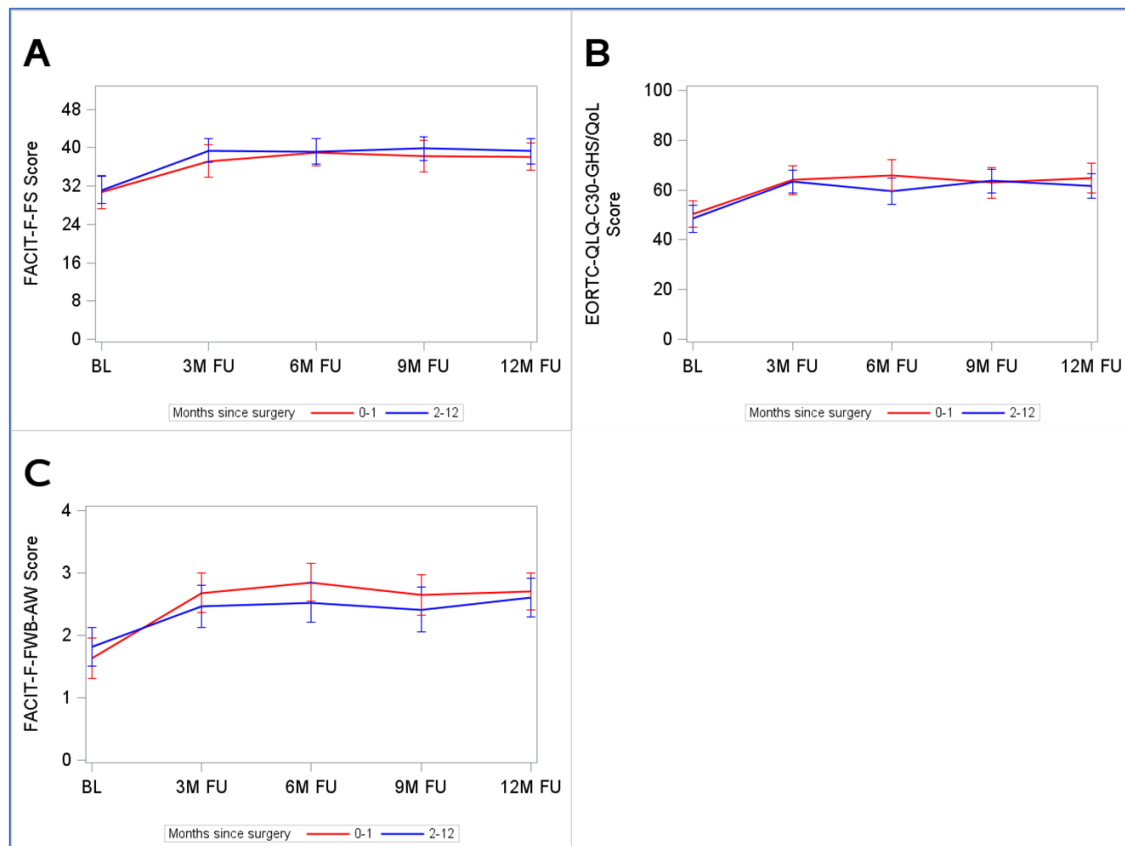

**Suppl. Figure S5.** Trajectories of FACIT-F-FS (A), EORTC-QLQ-C30-GHS/QoL (B), and FACIT-F-FWB-AW (C) from baseline to 12-month follow-up by time since surgery

Abbreviations: BL, baseline; 3M FU, 3-month follow-up; 6M FU, 6-month follow-up; 9M FU, 9-month follow-up; 12M FU, 12-month follow-up

Note: The figure displays means with 95% confidence intervals.

Only study participants with complete follow-up data were included in this analysis (n=114).
